# Supplementary material
Source: publisher figshare collection journal article supplement (https://tandf.figshare.com/ndownloader/files/22726709)
Supplement: Supplementary file 1 [file 22726709]

Appendix

List of stimuli

|  | **Distractor Type** | | | |
| --- | --- | --- | --- | --- |
| *Response Set* | | *Non-Response Set* | |
| **Target Picture** | *Related* | *Unrelated* | *Related* | *Unrelated* |
| apple | strawberry | trumpet | lemon | flute |
| banana | orange | drum | grapes | horn |
| bed | mirror | sheep | wardrobe | donkey |
| bench | drawer | horse | desk | cat |
| bike | car | table | submarine | wardrobe |
| boat | train | drawer | van | chair |
| bomb | gun | shirt | rifle | coat |
| bra | tie | helicopter | shoe | truck |
| cannon | spear | sock | arrow | belt |
| car | helicopter | bed | truck | sofa |
| castle | windmill | spear | bridge | grenade |
| church | lighthouse | sword | hotel | arrow |
| cow | mouse | lighthouse | rabbit | hotel |
| drawer | table | pig | stool | wolf |
| drum | harp | pear | cello | melon |
| guitar | drum | orange | horn | cherry |
| gun | sword | tie | missile | shoe |
| harp | trumpet | strawberry | flute | lemon |
| hat | shirt | bike | dress | submarine |
| helicopter | boat | mirror | bus | stool |
| horse | sheep | windmill | cat | tunnel |
| lighthouse | castle | cannon | tunnel | dagger |
| mirror | bench | cow | chair | fox |
| mouse | pig | prison | wolf | bridge |
| orange | pear | guitar | cherry | violin |
| pear | apple | harp | melon | cello |
| piano | guitar | apple | violin | grapes |
| pig | cow | church | fox | hut |
| prison | church | bomb | cottage | missile |
| sheep | horse | castle | donkey | cottage |
| shirt | hat | train | belt | van |
| sock | bra | car | coat | airplane |
| spear | bomb | bra | dagger | dress |
| strawberry | banana | piano | peach | organ |
| sword | cannon | hat | grenade | gloves |
| table | bed | mouse | sofa | rabbit |
| tie | sock | boat | gloves | bus |
| train | bike | bench | airplane | desk |
| trumpet | piano | banana | organ | peach |
| windmill | prison | gun | hut | rifle |
